# Supplementary material for: Mild Endurance Exercise during Fasting Increases Gastrocnemius Muscle and Prefrontal Cortex Thyroid Hormone Levels through Differential BHB and BCAA-Mediated BDNF-mTOR Signaling in Rats
Source: MDPI journal article supplement (doi:10.3390/nu14061166), 2022-03-10
Supplement: s1 [file s1]

**Table S1.** ANOVA P-values for each measurement carried out in this study

| FIGURE            | Gene-Protein-Compound     | ANOVA P value |
|-------------------|---------------------------|---------------|
| <b>Figure 1 A</b> | BHB                       | <0.0001       |
|                   | Leu                       | <0.0001       |
|                   | Ile                       | <0.0001       |
|                   | Val                       | <0.0001       |
| <b>Figure 1 B</b> | mBDNF/ACTIN               | 0.0092        |
|                   | P-TRKB/TRKB               | 0.0031        |
|                   | P-CREB/CREB               | 0.0210        |
|                   | P-AKT/AKT                 | 0.0094        |
|                   | P-4EBP1/4EBP1             | 0.0104        |
|                   | P-P70S6K/ACTIN            | 0.0401        |
|                   | P-FOXO1/FOXO1             | 0.0459        |
|                   | CASPASE3/ACTIN            | 0.0274        |
| <b>Figure 2 A</b> | T3 (serum)                | 0.0015        |
|                   | T4 (serum)                | <0.0001       |
|                   | T3 (Gastrocnemius muscle) | <0.0001       |
|                   | T4 (Gastrocnemius muscle) | 0.1824        |
| <b>Figure 2 B</b> | DIO2                      | 0.0026        |
|                   | DIO3                      | <0.0001       |
|                   | MCT2                      | 0.0246        |
|                   | LAT1                      | 0.0055        |
|                   | LAT2                      | <0.0001       |
| <b>Figure 3 B</b> | BDNF rel. mRNA levels     | <0.0001       |
| <b>Figure 3 C</b> | mBDNF/ACTIN               | 0.0008        |
| <b>Figure 4 A</b> | BHB                       | 0.3538        |
|                   | Leu                       | <0.0001       |
|                   | Ile                       | 0.2078        |
|                   | Val                       | 0.0550        |
| <b>Figure 4 B</b> | P-CREB/CREB               | 0.0281        |
|                   | mBDNF/ACTIN               | 0.9829        |
|                   | P-TRKB/TRKB               | 0.0121        |

|                   |                        |         |
|-------------------|------------------------|---------|
|                   | P-TRKAB/TRKB           | 0.0016  |
|                   | P-AKT/AKT              | 0.0012  |
|                   | P-4EBP1/4EBP1          | 0.0111  |
|                   | P-P70S6K/ P70S6K       | 0.0140  |
|                   | P-FOXO1/FOXO1          | 0.5699  |
| <b>Figure 5 A</b> |                        |         |
|                   | T3 (Prefrontal cortex) | <0.0001 |
| <b>Figure 5 B</b> |                        |         |
|                   | DIO2                   | 0.4829  |
|                   | DIO3                   | <0.0001 |
|                   | MCT2                   | 0.2300  |
|                   | LAT1                   | 0.0102  |
|                   | LAT2                   | 0.6216  |
| <b>Figure 6 A</b> |                        |         |
|                   | MCT8                   | 0.9866  |
|                   | MCT10                  | 0.0003  |
|                   | OATP1C                 | 0.2352  |
|                   | OXCT1                  | 0.0012  |
|                   | BDH1                   | 0.1050  |
|                   | BDNF                   | 0.3550  |
|                   | TRKB                   | 0.2187  |
|                   | PGC1- $\alpha$         | 0.9661  |
| <b>Figure 6 B</b> |                        |         |
|                   | KLF9                   | 0.0361  |
|                   | CALB1                  | 0.0340  |
|                   | HR                     | 0.0044  |
|                   | RASD2                  | 0.0324  |
|                   | SEMA3C                 | 0.0079  |
|                   | SHH                    | 0.0266  |
